# Supplementary material for: Bis-cyclometalated iridium(iii) complexes with terpyridine analogues: syntheses, structures, spectroscopy and computational studies
Source: Royal Society of Chemistry journal article supplement (doi:10.1039/d1ra07213g), 2021-01-01
Supplement: d1ra07213g1.pdf [file d1ra07213g1.pdf]

**Bis-cyclometalated iridium(III) complexes with terpyridine  
analogues: syntheses, structures, spectroscopy and computational  
studies**

Haleema Y. Otaif, Samuel J. Adams, Peter N. Horton, Simon J. Coles, Joseph M.  
Beames, Simon J.A. Pope

**Electronic Supplementary Information**

**Contents**

|                  |            |
|------------------|------------|
| <b>Table S1</b>  | <b>p2</b>  |
| <b>Table S2</b>  | <b>p3</b>  |
| <b>Figure S1</b> | <b>p3</b>  |
| <b>Figure S2</b> | <b>p4</b>  |
| <b>Figure S3</b> | <b>p5</b>  |
| <b>Figure S4</b> | <b>p5</b>  |
| <b>Table S3</b>  | <b>p6</b>  |
| <b>Table S4</b>  | <b>p7</b>  |
| <b>Table S5</b>  | <b>p8</b>  |
| <b>Table S6</b>  | <b>p9</b>  |
| <b>Table S7</b>  | <b>p9</b>  |
| <b>Table S8</b>  | <b>p9</b>  |
| <b>Figure S5</b> | <b>p10</b> |
| <b>Table S9</b>  | <b>p10</b> |
| <b>Table S10</b> | <b>p11</b> |
| <b>Figure S6</b> | <b>p11</b> |
| <b>Figure S7</b> | <b>p12</b> |

**Table S1.** Data collection parameters for the crystal structures.

| Compound                                       | [Ir(dpqx1 <sup>-</sup> ) <sub>2</sub> ]PF <sub>6</sub>              | [Ir(dpqx2 <sup>-</sup> ) <sub>2</sub> ]PF <sub>6</sub>                 |
|------------------------------------------------|---------------------------------------------------------------------|------------------------------------------------------------------------|
| Formula                                        | C <sub>48</sub> F <sub>6</sub> H <sub>37</sub> IrN <sub>11</sub> OP | C <sub>50.5</sub> ClF <sub>6</sub> H <sub>41</sub> IrN <sub>10</sub> P |
| <i>D</i> <sub>calc.</sub> / g cm <sup>-3</sup> | 1.701                                                               | 1.569                                                                  |
| <i>μ</i> /mm <sup>-1</sup>                     | 3.166                                                               | 6.659                                                                  |
| Formula Weight                                 | 1121.05                                                             | 1160.55                                                                |
| Colour                                         | red                                                                 | red                                                                    |
| Shape                                          | prism                                                               | plate                                                                  |
| Size/mm <sup>3</sup>                           | 0.208×0.144×0.024                                                   | 0.060×0.050×0.010                                                      |
| <i>T</i> /K                                    | 100(2)                                                              | 100(2)                                                                 |
| Crystal System                                 | monoclinic                                                          | monoclinic                                                             |
| Space Group                                    | <i>P</i> 2 <sub>1</sub> / <i>n</i>                                  | <i>I</i> 2/ <i>a</i>                                                   |
| <i>a</i> /Å                                    | 15.61910(10)                                                        | 20.0555(5)                                                             |
| <i>b</i> /Å                                    | 17.9773(2)                                                          | 17.4269(3)                                                             |
| <i>c</i> /Å                                    | 15.73360(10)                                                        | 29.5696(14)                                                            |
| <i>α</i> /°                                    | 90                                                                  | 90                                                                     |
| <i>β</i> /°                                    | 97.8170(10)                                                         | 108.009(4)                                                             |
| <i>γ</i> /°                                    | 90                                                                  | 90                                                                     |
| <i>V</i> /Å <sup>3</sup>                       | 4376.77(6)                                                          | 9828.4(6)                                                              |
| <i>Z</i>                                       | 4                                                                   | 8                                                                      |
| <i>Z</i> '                                     | 1                                                                   | 1                                                                      |
| Wavelength/Å                                   | 0.71075                                                             | 1.54178                                                                |
| Radiation type                                 | MoK <sub>α</sub>                                                    | CuK <sub>α</sub>                                                       |
| <i>θ</i> <sub>min</sub> /°                     | 1.724                                                               | 2.983                                                                  |
| <i>θ</i> <sub>max</sub> /°                     | 28.701                                                              | 68.233                                                                 |
| Measured Refl.                                 | 85017                                                               | 60261                                                                  |
| Independent Refl.                              | 11289                                                               | 8958                                                                   |
| Reflections with <i>I</i> > 9970               |                                                                     | 6008                                                                   |
| 2( <i>I</i> )                                  |                                                                     |                                                                        |
| <i>R</i> <sub>int</sub>                        | 0.0371                                                              | 0.0687                                                                 |
| Parameters                                     | 569                                                                 | 621                                                                    |
| Restraints                                     | 0                                                                   | 0                                                                      |
| Largest Peak                                   | 3.846                                                               | 2.863                                                                  |
| Deepest Hole                                   | -0.784                                                              | -1.293                                                                 |
| Goof                                           | 1.058                                                               | 1.033                                                                  |
| <i>wR</i> <sub>2</sub> (all data)              | 0.0716                                                              | 0.1436                                                                 |
| <i>wR</i> <sub>2</sub>                         | 0.0697                                                              | 0.1284                                                                 |
| <i>R</i> <sub>1</sub> (all data)               | 0.0356                                                              | 0.0729                                                                 |
| <i>R</i> <sub>1</sub>                          | 0.0298                                                              | 0.0493                                                                 |

**Table S2.** Selected bond angles for the complexes.

| [Ir(dqxp1 <sup>-</sup> ) <sub>2</sub> ]PF <sub>6</sub> |       |       |            | [Ir(dqxp2 <sup>-</sup> ) <sub>2</sub> ]PF <sub>6</sub> |       |       |            |
|--------------------------------------------------------|-------|-------|------------|--------------------------------------------------------|-------|-------|------------|
| Atom                                                   | Atom  | Atom  | Angle/°    | Atom                                                   | Atom  | Atom  | Angle/°    |
| N(1)                                                   | Ir(1) | N(2)  | 77.14(10)  | N(1)                                                   | Ir(1) | N(4)  | 76.67(19)  |
| N(1)                                                   | Ir(1) | N(32) | 110.82(9)  | N(1)                                                   | Ir(1) | N(31) | 174.31(18) |
| N(31)                                                  | Ir(1) | N(1)  | 170.86(10) | N(1)                                                   | Ir(1) | N(34) | 104.31(19) |
| N(31)                                                  | Ir(1) | N(2)  | 108.97(9)  | N(4)                                                   | Ir(1) | N(34) | 92.90(17)  |
| N(31)                                                  | Ir(1) | N(32) | 76.53(10)  | N(31)                                                  | Ir(1) | N(4)  | 108.93(19) |
| N(2)                                                   | Ir(1) | N(32) | 89.59(9)   | N(31)                                                  | Ir(1) | N(34) | 76.7(2)    |
| C(45)                                                  | Ir(1) | N(1)  | 90.83(10)  | C(1)                                                   | Ir(1) | N(1)  | 81.7(2)    |
| C(45)                                                  | Ir(1) | N(31) | 82.12(10)  | C(1)                                                   | Ir(1) | N(4)  | 158.4(2)   |
| C(45)                                                  | Ir(1) | N(2)  | 93.60(9)   | C(1)                                                   | Ir(1) | N(31) | 92.7(2)    |
| C(45)                                                  | Ir(1) | N(32) | 158.27(10) | C(1)                                                   | Ir(1) | N(34) | 93.1(2)    |
| C(15)                                                  | Ir(1) | N(1)  | 82.15(11)  | C(1)                                                   | Ir(1) | C(31) | 90.1(2)    |
| C(15)                                                  | Ir(1) | N(31) | 91.84(11)  | C(31)                                                  | Ir(1) | N(1)  | 96.8(2)    |
| C(15)                                                  | Ir(1) | N(2)  | 159.19(11) | C(31)                                                  | Ir(1) | N(4)  | 91.7(2)    |
| C(15)                                                  | Ir(1) | N(32) | 95.87(10)  | C(31)                                                  | Ir(1) | N(31) | 82.2(2)    |
| C(15)                                                  | Ir(1) | C(45) | 88.73(10)  | C(31)                                                  | Ir(1) | N(34) | 158.9(2)   |

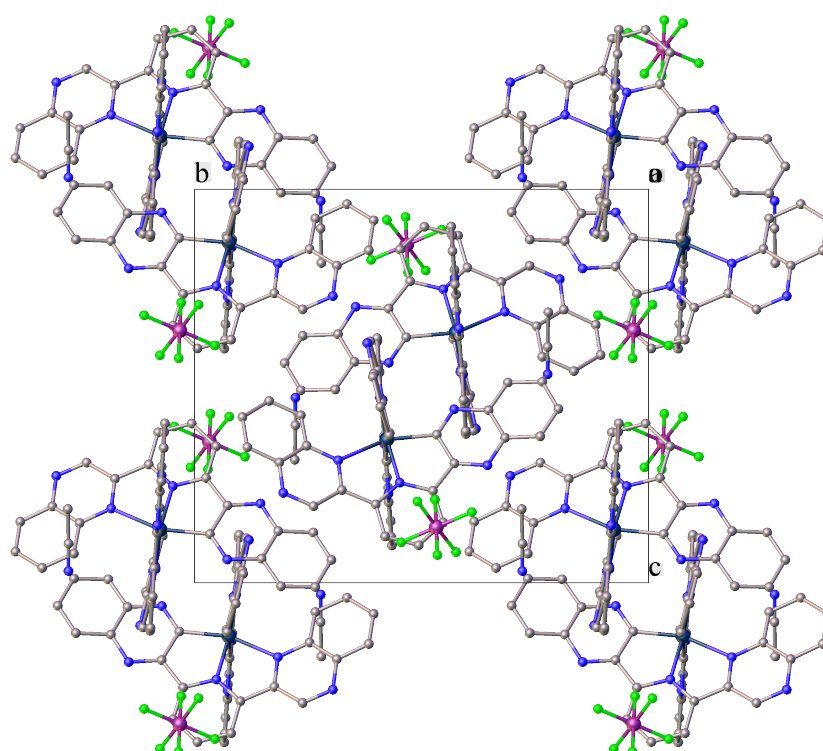

**Figure S1.** Packing diagram of complex [Ir(dqxp1<sup>-</sup>)<sub>2</sub>]PF<sub>6</sub>.

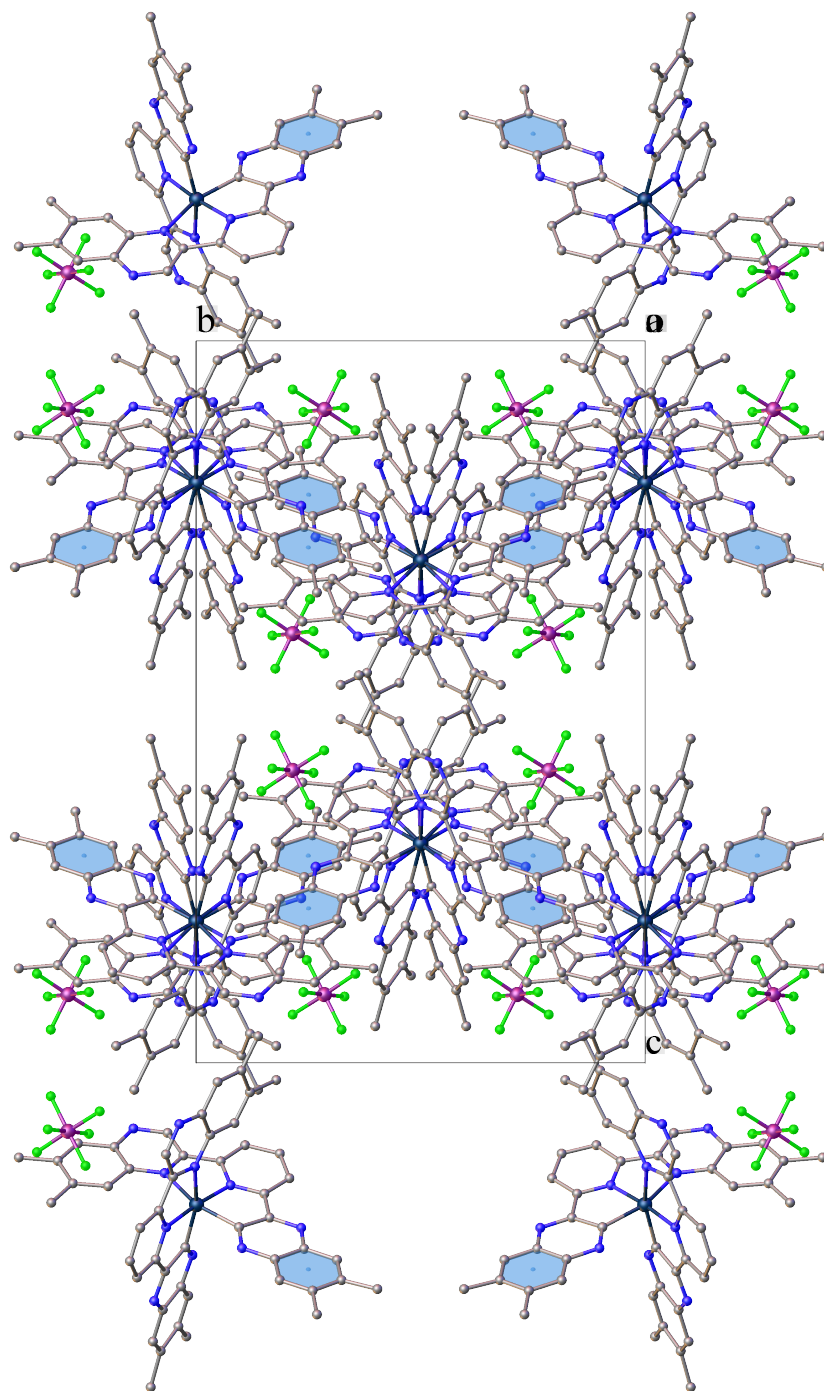

**Figure S2.** Packing diagram of complex  $[\text{Ir}(\text{dqxp}2^-)_2]\text{PF}_6$ .

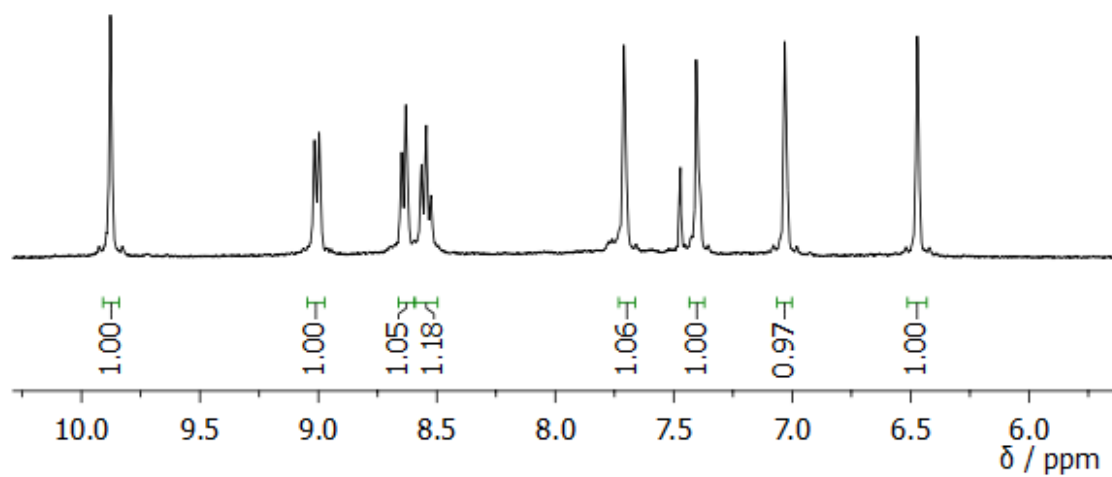

**Figure S3.**  $^1\text{H}$  NMR spectrum ( $\text{CD}_3\text{CN}$ ) of  $[\text{Ir}(\text{dqxp}2^-)_2]\text{PF}_6$  showing the unique proton environments in the aromatic region.

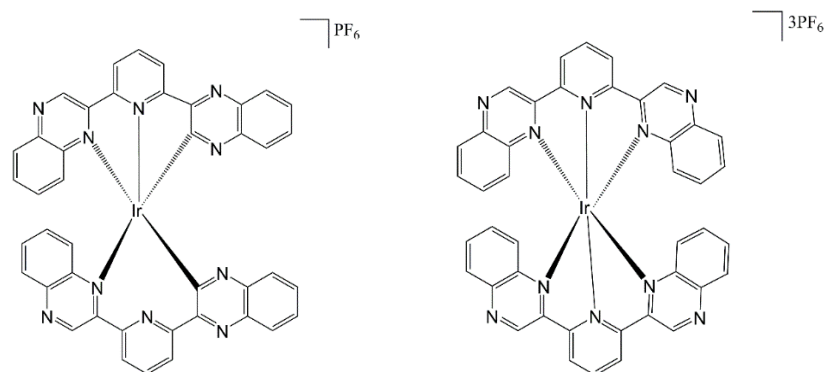

**Figure S4.** Hypothetical structures comparing the  $\text{N}^{\wedge}\text{N}^{\wedge}\text{C}$  and  $\text{N}^{\wedge}\text{N}^{\wedge}\text{N}$  homoleptic coordination modes of the tridentate ligands.

**Table S3.** Calculated energies, bond lengths and angles of the two different coordination modes using B3LYP.

|                 | <b>N<sup>^</sup>N<sup>^</sup>C mode</b> | <b>N<sup>^</sup>N<sup>^</sup>N mode</b> |
|-----------------|-----------------------------------------|-----------------------------------------|
| B3LYP Energy    | -2266.8188 Hartree<br>-61683.3108 eV    | -2267.5832Hartree<br>-61704.11122eV     |
| Internal Energy | -2266.2044 Hartree<br>-61666.5921 eV    | -2266.9408 Hartree<br>-61686.6306 eV    |
| ZPE             | 0.5768 Hartree<br>15.6956 eV            | 0.6051 Hartree<br>15.6928 eV            |

| <b>N<sup>^</sup>N<sup>^</sup>C mode</b> |            | <b>N<sup>^</sup>N<sup>^</sup>N mode</b> |            |
|-----------------------------------------|------------|-----------------------------------------|------------|
| Bond                                    | Length (Å) | Bond                                    | Length (Å) |
| Ir-N <sub>2</sub>                       | 2.3227     | Ir-N <sub>2</sub>                       | 2.169      |
| Ir-N <sub>5</sub>                       | 2.0235     | Ir-N <sub>5</sub>                       | 2.019      |
| Ir-C <sub>14</sub>                      | 2.0186     | Ir-N <sub>18</sub>                      | 2.158      |
| Ir-C <sub>40</sub>                      | 2.0014     | Ir-N <sub>41</sub>                      | 2.019      |
| Ir-N <sub>47</sub>                      | 2.0442     | Ir-N <sub>53</sub>                      | 2.162      |
| Ir-N <sub>50</sub>                      | 2.2901     | Ir-N <sub>70</sub>                      | 2.159      |

| <b>N<sup>^</sup>N<sup>^</sup>C mode</b> |            | <b>N<sup>^</sup>N<sup>^</sup>N mode</b> |            |
|-----------------------------------------|------------|-----------------------------------------|------------|
|                                         | Angles (°) |                                         | Angles (°) |
| N <sub>2</sub> -Ir-N <sub>5</sub>       | 75.6969    | N <sub>2</sub> -Ir-N <sub>5</sub>       | 78.302     |
| C <sub>14</sub> -Ir-N <sub>5</sub>      | 82.0842    | N <sub>2</sub> -Ir-N <sub>70</sub>      | 88.787     |
| C <sub>40</sub> -Ir-N <sub>2</sub>      | 98.3608    | N <sub>5</sub> -Ir-N <sub>18</sub>      | 78.455     |
| C <sub>40</sub> -Ir-N <sub>5</sub>      | 97.8383    | N <sub>5</sub> -Ir-N <sub>70</sub>      | 101.592    |
| C <sub>14</sub> -Ir-C <sub>40</sub>     | 88.4132    | N <sub>18</sub> -Ir-N <sub>70</sub>     | 95.677     |
| C <sub>14</sub> -Ir-C <sub>40</sub>     | 88.4132    | N <sub>18</sub> -Ir-N <sub>53</sub>     | 88.062     |
| C <sub>14</sub> -Ir-N <sub>47</sub>     | 97.9157    | N <sub>41</sub> -Ir-N <sub>53</sub>     | 78.396     |
| C <sub>14</sub> -Ir-N <sub>50</sub>     | 87.3719    | N <sub>41</sub> -Ir-N <sub>70</sub>     | 78.453     |
| C <sub>40</sub> -Ir-N <sub>47</sub>     | 82.1621    | N <sub>18</sub> -Ir-N <sub>41</sub>     | 101.726    |
| N <sub>47</sub> -Ir-N <sub>50</sub>     | 75.3388    | N <sub>18</sub> -Ir-N <sub>70</sub>     | 93.9384    |

**Table S4.** Calculated energies, bond lengths and angles of the two different coordination modes using B3LYP/LANL2DZ.

|                 | <b>N<sup>^</sup>N<sup>^</sup>C mode</b> | <b>N<sup>^</sup>N<sup>^</sup>N mode</b> |
|-----------------|-----------------------------------------|-----------------------------------------|
| B3LYP Energy    | -2266.1273 Hartree<br>-61691.70542 eV   | -2267.8926 Hartree<br>-61712.53 eV      |
| Internal Energy | -2266.5124 Hartree<br>-61674.9756 eV    | -2267.2498 Hartree<br>-61695.04049 eV   |
| ZPE             | 0.57674 Hartree<br>15.7112 eV           | 0.605449 Hartree<br>16.4751 eV          |

| <b>N<sup>^</sup>N<sup>^</sup>C mode</b> |            | <b>N<sup>^</sup>N<sup>^</sup>N mode</b> |            |
|-----------------------------------------|------------|-----------------------------------------|------------|
| Bond                                    | Length (Å) | Bond                                    | Length (Å) |
| Ir-N <sub>2</sub>                       | 2.030      | Ir-N <sub>2</sub>                       | 2.164      |
| Ir-N <sub>27</sub>                      | 2.284      | Ir-N <sub>5</sub>                       | 2.012      |
| Ir-C <sub>5</sub>                       | 2.011      | Ir-N <sub>18</sub>                      | 2.153      |
| Ir-C <sub>43</sub>                      | 2.011      | Ir-N <sub>41</sub>                      | 2.012      |
| Ir-N <sub>40</sub>                      | 2.030      | Ir-N <sub>53</sub>                      | 2.158      |
| Ir-N <sub>61</sub>                      | 2.285      | Ir-N <sub>70</sub>                      | 2.154      |

| <b>N<sup>^</sup>N<sup>^</sup>C mode</b> |            | <b>N<sup>^</sup>N<sup>^</sup>N mode</b> |            |
|-----------------------------------------|------------|-----------------------------------------|------------|
|                                         | Angles (°) |                                         | Angles (°) |
| N <sub>2</sub> -Ir-N <sub>27</sub>      | 75.703     | N <sub>2</sub> -Ir-N <sub>5</sub>       | 78.454     |
| C <sub>5</sub> -Ir-N <sub>2</sub>       | 81.887     | N <sub>2</sub> -Ir-N <sub>70</sub>      | 88.496     |
| C <sub>43</sub> -Ir-N <sub>2</sub>      | 95.535     | N <sub>5</sub> -Ir-N <sub>18</sub>      | 78.604     |
| C <sub>43</sub> -Ir-N <sub>27</sub>     | 91.105     | N <sub>5</sub> -Ir-N <sub>70</sub>      | 101.481    |
| C <sub>5</sub> -Ir-C <sub>43</sub>      | 91.030     | N <sub>18</sub> -Ir-N <sub>70</sub>     | 95.835     |
| C <sub>5</sub> -Ir-N <sub>61</sub>      | 90.924     | N <sub>18</sub> -Ir-N <sub>53</sub>     | 87.838     |
| C <sub>5</sub> -Ir-N <sub>40</sub>      | 92.944     | N <sub>41</sub> -Ir-N <sub>53</sub>     | 78.548     |
| C <sub>43</sub> -Ir-N <sub>40</sub>     | 81.900     | N <sub>41</sub> -Ir-N <sub>70</sub>     | 78.605     |
| C <sub>43</sub> -Ir-N <sub>2</sub>      | 92.621     | N <sub>18</sub> -Ir-N <sub>41</sub>     | 101.584    |
| N <sub>40</sub> -Ir-N <sub>61</sub>     | 75.668     | N <sub>18</sub> -Ir-N <sub>70</sub>     | 95.835     |

**Table S5.** Calculated energies, bond lengths and angles of the two different coordination modes using M062X/LANL2DZ.

|                 | <b>N<sup>^</sup>N<sup>^</sup>C mode</b> | <b>N<sup>^</sup>N<sup>^</sup>N mode</b> |
|-----------------|-----------------------------------------|-----------------------------------------|
| M062X Energy    | -2266.15195 Hartree<br>-61665.16483 eV  | -2266.9041 Hartree<br>-61685.6313 eV    |
| Internal Energy | -2265.53067 Hartree<br>-61648.2587 eV   | -2266.2555 Hartree<br>-61667.9822 eV    |
| ZPE             | 0.584044 Hartree<br>15.8927 eV          | 0.611566 Hartree<br>16.6416 eV          |

| <b>N<sup>^</sup>N<sup>^</sup>C mode</b> |            | <b>N<sup>^</sup>N<sup>^</sup>N mode</b> |            |
|-----------------------------------------|------------|-----------------------------------------|------------|
| Bond                                    | Length (Å) | Bond                                    | Length (Å) |
| Ir-N <sub>2</sub>                       | 2.030      | Ir-N <sub>2</sub>                       | 2.138      |
| Ir-N <sub>27</sub>                      | 2.297      | Ir-N <sub>5</sub>                       | 2.004      |
| Ir-C <sub>5</sub>                       | 1.976      | Ir-N <sub>18</sub>                      | 2.134      |
| Ir-C <sub>43</sub>                      | 2.011      | Ir-N <sub>41</sub>                      | 2.004      |
| Ir-N <sub>40</sub>                      | 2.030      | Ir-N <sub>53</sub>                      | 2.137      |
| Ir-N <sub>61</sub>                      | 2.298      | Ir-N <sub>70</sub>                      | 2.136      |

| <b>N<sup>^</sup>N<sup>^</sup>C mode</b> |            | <b>N<sup>^</sup>N<sup>^</sup>N mode</b> |            |
|-----------------------------------------|------------|-----------------------------------------|------------|
|                                         | Angles (°) |                                         | Angles (°) |
| N <sub>2</sub> -Ir-N <sub>27</sub>      | 75.206     | N <sub>2</sub> -Ir-N <sub>5</sub>       | 78.789     |
| C <sub>5</sub> -Ir-N <sub>2</sub>       | 82.686     | N <sub>2</sub> -Ir-N <sub>70</sub>      | 86.706     |
| C <sub>43</sub> -Ir-N <sub>2</sub>      | 91.621     | N <sub>5</sub> -Ir-N <sub>18</sub>      | 78.784     |
| C <sub>43</sub> -Ir-N <sub>27</sub>     | 91.829     | N <sub>5</sub> -Ir-N <sub>70</sub>      | 100.989    |
| C <sub>5</sub> -Ir-C <sub>43</sub>      | 91.008     | N <sub>18</sub> -Ir-N <sub>70</sub>     | 97.582     |
| C <sub>5</sub> -Ir-N <sub>61</sub>      | 91.663     | N <sub>18</sub> -Ir-N <sub>53</sub>     | 86.470     |
| C <sub>5</sub> -Ir-N <sub>40</sub>      | 92.965     | N <sub>41</sub> -Ir-N <sub>53</sub>     | 78.773     |
| C <sub>43</sub> -Ir-N <sub>40</sub>     | 82.712     | N <sub>41</sub> -Ir-N <sub>70</sub>     | 78.798     |
| C <sub>43</sub> -Ir-N <sub>2</sub>      | 91.621     | N <sub>18</sub> -Ir-N <sub>41</sub>     | 101.398    |
| N <sub>40</sub> -Ir-N <sub>61</sub>     | 75.147     | N <sub>18</sub> -Ir-N <sub>70</sub>     | 97.582     |



**Table S6.** A comparison of experimentally determined and calculated bond lengths (Å) for the coordination spheres of the complexes.

| $[\text{Ir}(\text{dqxp}1^-)_2]\text{PF}_6$ |       |             |              | $[\text{Ir}(\text{dqxp}2^-)_2]\text{PF}_6$ |       |             |              |
|--------------------------------------------|-------|-------------|--------------|--------------------------------------------|-------|-------------|--------------|
|                                            |       | <b>Exp.</b> | <b>Calc.</b> |                                            |       | <b>Exp.</b> | <b>Calc.</b> |
| Ir(1)                                      | N(1)  | 1.999(2)    | 2.037        | Ir(1)                                      | N(1)  | 2.009(5)    | 2.036        |
| Ir(1)                                      | N(31) | 1.997(2)    | 2.037        | Ir(1)                                      | N(4)  | 2.191(5)    | 2.277        |
| Ir(1)                                      | N(2)  | 2.183(2)    | 2.279        | Ir(1)                                      | N(31) | 2.017(5)    | 2.036        |
| Ir(1)                                      | N(32) | 2.199(2)    | 2.279        | Ir(1)                                      | N(34) | 2.198(5)    | 2.276        |
| Ir(1)                                      | C(45) | 1.993(3)    | 2.019        | Ir(1)                                      | C(1)  | 1.999(6)    | 2.020        |
| Ir(1)                                      | C(15) | 1.989(3)    | 2.019        | Ir(1)                                      | C(31) | 2.005(7)    | 2.020        |

**Table S7.** The decomposition analysis of the singlet ground state frontier orbitals of  $[\text{Ir}(\text{dqxp}2^-)_2]^+$ .

| Orbital | Moiety Contribution to Orbital (%) |    |    |    |    |    |    |
|---------|------------------------------------|----|----|----|----|----|----|
|         | Ir<br>5d                           | Q1 |    |    | Q2 |    |    |
|         |                                    | R1 | R2 | R3 | R1 | R2 | R3 |
| LUMO +4 | 1                                  | 34 | 16 | 0  | 33 | 15 | 0  |
| LUMO +3 | 1                                  | 0  | 22 | 27 | 0  | 22 | 27 |
| LUMO +2 | 1                                  | 1  | 20 | 29 | 1  | 20 | 29 |
| LUMO +1 | 4                                  | 40 | 12 | 0  | 33 | 10 | 0  |
| LUMO    | 4                                  | 31 | 11 | 1  | 39 | 14 | 1  |
| HOMO    | 26                                 | 2  | 3  | 32 | 2  | 3  | 32 |
| HOMO -1 | 4                                  | 2  | 4  | 40 | 2  | 5  | 43 |
| HOMO -2 | 6                                  | 1  | 5  | 42 | 1  | 5  | 39 |
| HOMO -3 | 2                                  | 2  | 4  | 42 | 2  | 4  | 42 |
| HOMO -4 | 8                                  | 2  | 1  | 43 | 2  | 1  | 42 |

**Table S8.** The decomposition analysis of the singlet ground state frontier orbitals of  $[\text{Ir}(\text{dqxp}2^-)_2]^+$ .

| $[\text{Ir}(\text{dqxp}2^-)_2]\text{PF}_6$ |                                                                               |
|--------------------------------------------|-------------------------------------------------------------------------------|
| <b>Transition</b>                          | <b>Contributing MOs</b>                                                       |
| 1 389.73nm, f= 0.0218                      | HOMO → LUMO +1 (77%)                                                          |
| 2 388.5 nm, f = 0.0162                     | HOMO → LUMO (79%)                                                             |
| 3 352.33 nm, f = 0.0024                    | HOMO -6 → LUMO +3 (24%)<br>HOMO -4 → LUMO +2 (45%)                            |
| 4 350.92 nm, f = 0.0003                    | HOMO -6 → LUMO +2 (11%)<br>HOMO -5 → LUMO +2 (29%)<br>HOMO -4 → LUMO +3 (39%) |
| 5 349.04 nm, f = 0.0311                    | HOMO -6 → LUMO (27%)<br>HOMO -5 → LUMO (22%)<br>HOMO -3 → LUMO (12%)          |

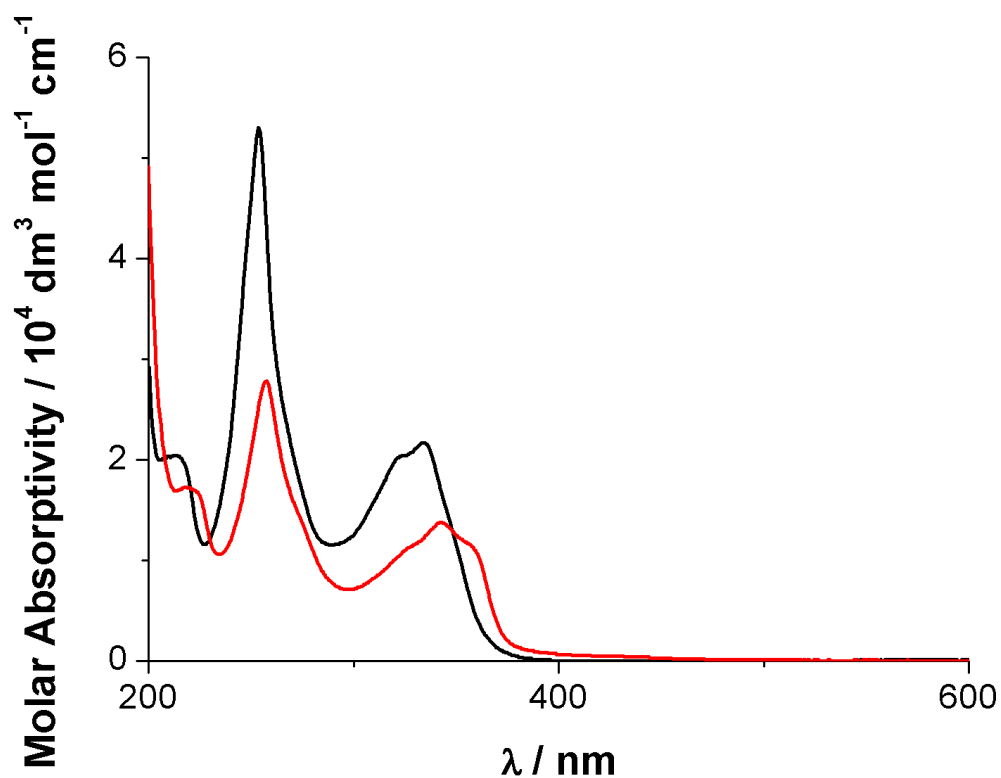

**Figure S5.** UV-Vis. absorption spectrum of **dqxp1** (black) and **dqxp2** (red) in EtOH solution.

**Table S9.** Solvatochromic photophysical data for  $[\text{Ir}(\text{dqxp1}^-)_2]\text{PF}_6$ .

| Solvent | Absorption<br>( $\epsilon \times 10^4 / \text{M}^{-1}\text{cm}^{-1}$ ) /<br>nm | Emission /nm | Lifetime / ns | Quantum yield (%) |
|---------|--------------------------------------------------------------------------------|--------------|---------------|-------------------|
| MeCN    | 260 (9.0), 309 (5.2),<br>365 (4.5)                                             | 614          | 310           | 1.8               |
| EtOH    | 258 (8.1), 318 (5.4),<br>366 (4.9)                                             | 614          | 198           | 1.1               |
| MeOH    | 261 (10.0), 309<br>(5.5), 365 (5.0)                                            | 620          | 134           | 0.6               |

**Table S10.** Solvatochromic photophysical data for  $[\text{Ir}(\text{dqxp}2^-)_2]\text{PF}_6$ .

| Solvent | Absorption<br>( $\epsilon \times 10^4 / \text{M}^{-1}\text{cm}^{-1}$ ) /<br>nm | Emission /nm | Lifetime / ns | Quantum yield (%) |
|---------|--------------------------------------------------------------------------------|--------------|---------------|-------------------|
| MeCN    | 265 (7.1), 328 (4.2),<br>376 (3.9)                                             | 617          | 323           | 2.0               |
| EtOH    | 266 (7.7), 330 (4.6),<br>376 (4.3)                                             | 623          | 209           | 1.1               |
| MeOH    | 264 (7.8), 329 (4.5),<br>376 (4.3)                                             | 629          | 145           | 0.7               |

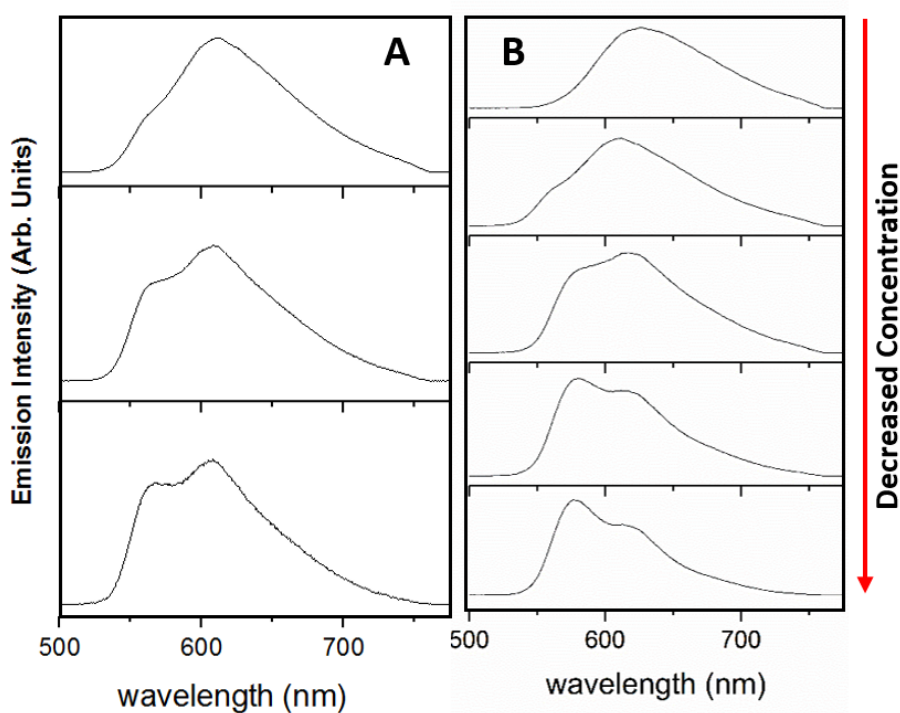**Figure S6.** Normalised emission intensities of the two complexes at various dilutions (approx.  $10^{-6}$  to  $10^{-3}$  M), showing a clear spectral response to complex concentration. The left hand panel corresponds to  $[\text{Ir}(\text{dqxp}1^-)_2]\text{PF}_6$ , and the right to  $[\text{Ir}(\text{dqxp}2^-)_2]\text{PF}_6$ .

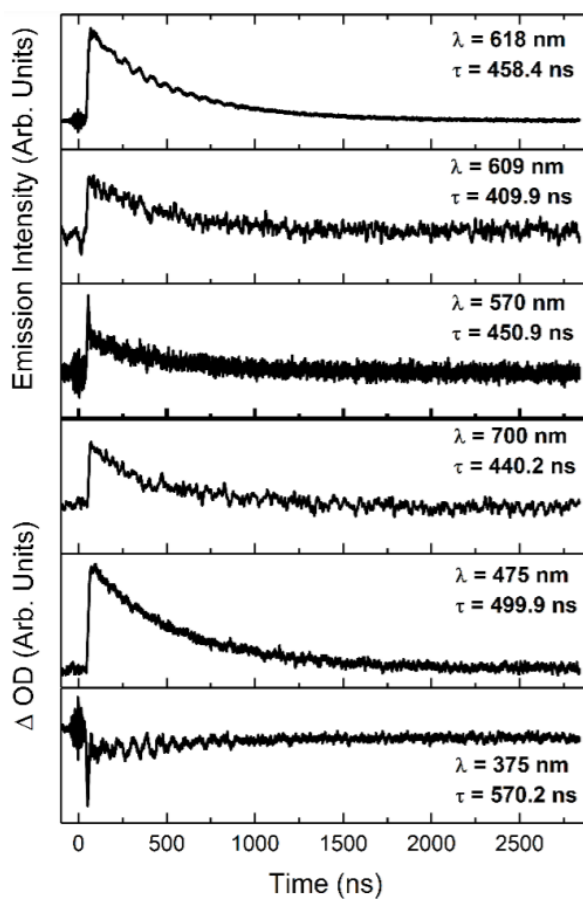

**Figure S7.** Kinetic traces of the major features of the transient spectra of  $[\text{Ir}(\text{dqxp}1^-)_2]\text{PF}_6$  in chloroform at room temperature, aerated. Wavelengths and lifetimes of each trace are inset.
